# Supplementary figures and images for: A TSHZ3 Frame-Shift Variant Causes Neurodevelopmental and Renal Disorder Consistent with Previously Described Proximal Chromosome 19q13.11 Deletion Syndrome
Source: MDPI journal article supplement (doi:10.3390/genes13122191), 2022-11-23

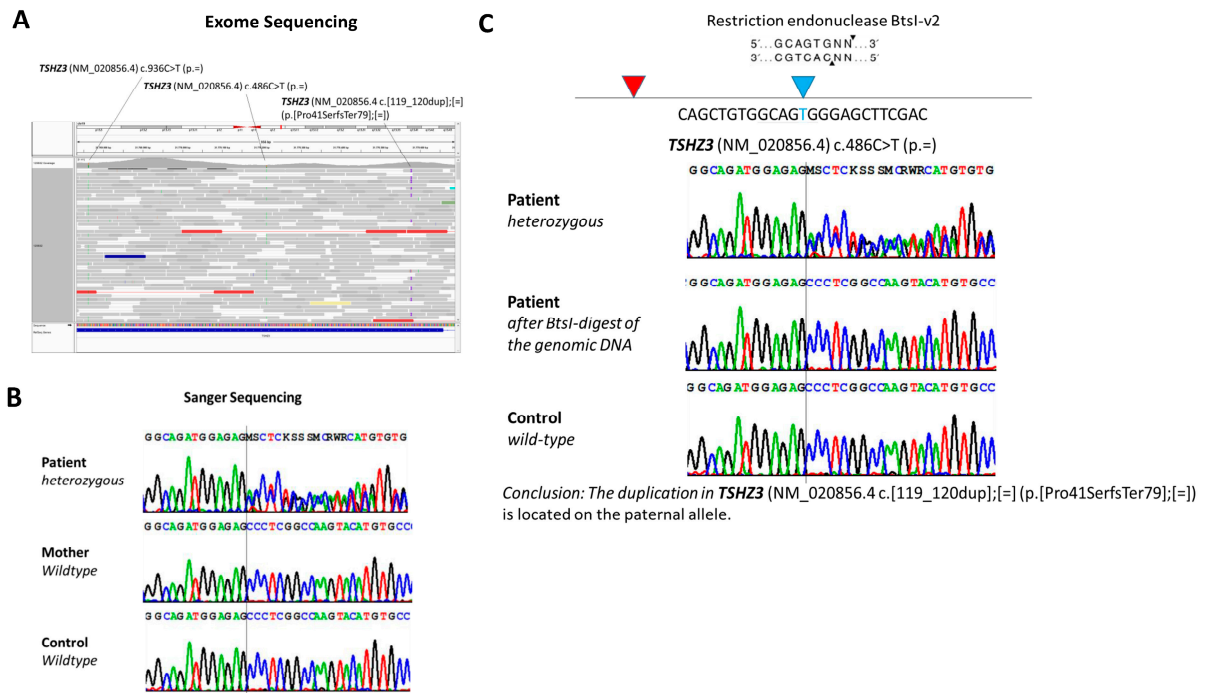

Supplementary Figure S1

Supplement: s1 [file s1]
